# Supplementary material for: Domino Aldol-SNAr-Dehydration Sequence for [3+3] Annulations to Prepare Quinolin-2(1H)-ones and 1,8-Naphthyridin-2(1H)-ones
Source: MDPI journal article supplement (doi:10.3390/molecules28155856), 2023-08-03

# Domino Aldol-S<sub>N</sub>Ar-Dehydration Sequence for [3+3] Annulations to Prepare Quinolin-2(1*H*)-ones and 1,8-Naphthyridin-2(1*H*)-ones

Kwabena Fobi, Ebenezer Ametsetor and Richard A. Bunce \*

Department of Chemistry, Oklahoma State University, Stillwater, OK, 74078-3071, USA

\* Correspondence: rab@okstate.edu; Tel.: +1-405-744-5952

## Supplementary Information

| Compound                                                                                              | page |
|-------------------------------------------------------------------------------------------------------|------|
| <sup>1</sup> H NMR for 2-(2-Fluorophenyl)acetamide ( <b>14</b> ) .....                                | 3    |
| <sup>13</sup> C NMR for 2-(2-Fluorophenyl)acetamide ( <b>14</b> ) .....                               | 3    |
| <sup>1</sup> H NMR for 2-(4-Chlorophenyl)acetamide ( <b>15</b> ) .....                                | 4    |
| <sup>13</sup> C NMR for 2-(4-Chlorophenyl)acetamide ( <b>15</b> ) .....                               | 4    |
| <sup>1</sup> H NMR for 2-(2,5-Dimethylphenyl)acetamide ( <b>16</b> ) .....                            | 5    |
| <sup>13</sup> C NMR for 2-(2,5-Dimethylphenyl)acetamide ( <b>16</b> ) .....                           | 5    |
| <sup>1</sup> H NMR for 6-Nitro-3-phenylquinolin-2(1 <i>H</i> )-one ( <b>17</b> ) .....                | 6    |
| <sup>13</sup> C NMR for 6-Nitro-3-phenylquinolin-2(1 <i>H</i> )-one ( <b>17</b> ) .....               | 6    |
| <sup>1</sup> H NMR for 6-Nitro-3-(phenylsulfonyl)quinolin-2(1 <i>H</i> )-one ( <b>18</b> ) .....      | 7    |
| <sup>13</sup> C NMR for 6-Nitro-3-(phenylsulfonyl)quinolin-2(1 <i>H</i> )-one ( <b>18</b> ) .....     | 7    |
| <sup>1</sup> H NMR for 3-Carbethoxy-6-nitroquinolin-2(1 <i>H</i> )-one ( <b>19</b> ) .....            | 8    |
| <sup>13</sup> C NMR for 3-Carbethoxy-6-nitroquinolin-2(1 <i>H</i> )-one ( <b>19</b> ) .....           | 8    |
| <sup>1</sup> H NMR for 3-(4-Methoxyphenyl)-6-nitroquinolin-2(1 <i>H</i> )-one ( <b>20</b> ) .....     | 9    |
| <sup>13</sup> C NMR for 3-(4-Methoxyphenyl)-6-nitroquinolin-2(1 <i>H</i> )-one ( <b>20</b> ) .....    | 9    |
| <sup>1</sup> H NMR for 3-(2-Fluorophenyl)-6-nitroquinolin-2(1 <i>H</i> )-one ( <b>21</b> ) .....      | 10   |
| <sup>13</sup> C NMR for 3-(2-Fluorophenyl)-6-nitroquinolin-2(1 <i>H</i> )-one ( <b>21</b> ) .....     | 10   |
| <sup>1</sup> H NMR for 3-(4-Chlorophenyl)-6-nitroquinolin-2(1 <i>H</i> )-one ( <b>22</b> ) .....      | 11   |
| <sup>13</sup> C NMR for 3-(4-Chlorophenyl)-6-nitroquinolin-2(1 <i>H</i> )-one ( <b>22</b> ) .....     | 11   |
| <sup>1</sup> H NMR for 3-(2,5-Dimethylphenyl)-6-nitroquinolin-2(1 <i>H</i> )-one ( <b>23</b> ) .....  | 12   |
| <sup>13</sup> C NMR for 3-(2,5-Dimethylphenyl)-6-nitroquinolin-2(1 <i>H</i> )-one ( <b>23</b> ) ..... | 12   |
| <sup>1</sup> H NMR for 6-Cyano-3-phenylquinolin-2(1 <i>H</i> )-one ( <b>24</b> ) .....                | 13   |
| <sup>13</sup> C NMR for 6-Cyano-3-phenylquinolin-2(1 <i>H</i> )-one ( <b>24</b> ) .....               | 13   |
| <sup>1</sup> H NMR for 6-Cyano-3-(phenylsulfonyl)quinolin-2(1 <i>H</i> )-one ( <b>25</b> ) .....      | 14   |
| <sup>13</sup> C NMR for 6-Cyano-3-(phenylsulfonyl)quinolin-2(1 <i>H</i> )-one ( <b>25</b> ) .....     | 14   |

|                                                                                                              |    |
|--------------------------------------------------------------------------------------------------------------|----|
| <sup>1</sup> H NMR for 6-Carbomethoxy-3-phenylquinolin-2(1 <i>H</i> )-one ( <b>26</b> ) .....                | 15 |
| <sup>13</sup> C NMR for 6-Carbomethoxy-3-phenylquinolin-2(1 <i>H</i> )-one ( <b>26</b> ) .....               | 15 |
| <sup>1</sup> H NMR for 6-Carbomethoxy-3-(phenylsulfonyl)quinolin-2(1 <i>H</i> )-one ( <b>27</b> ) .....      | 16 |
| <sup>13</sup> C NMR for 6-Carbomethoxy-3-(phenylsulfonyl)quinolin-2(1 <i>H</i> )-one ( <b>27</b> ).....      | 16 |
| <sup>1</sup> H NMR for 3-Phenyl-6-(trifluoromethyl)quinolin-2(1 <i>H</i> )-one ( <b>28</b> ).....            | 17 |
| <sup>13</sup> C NMR for 3-Phenyl-6-(trifluoromethyl)quinolin-2(1 <i>H</i> )-one ( <b>28</b> ).....           | 17 |
| <sup>1</sup> H NMR for 3-(Phenylsulfonyl)-6-(trifluoromethyl)quinolin-2(1 <i>H</i> )-one ( <b>29</b> ).....  | 18 |
| <sup>13</sup> C NMR for 3-(Phenylsulfonyl)-6-(trifluoromethyl)quinolin-2(1 <i>H</i> )-one ( <b>29</b> )..... | 18 |
| <sup>1</sup> H NMR for 3-Phenyl-1,8-naphthyridin-2(1 <i>H</i> )-one ( <b>30</b> ) .....                      | 19 |
| <sup>13</sup> C NMR for 3-Phenyl-1,8-naphthyridin-2(1 <i>H</i> )-one ( <b>30</b> ) .....                     | 19 |
| <sup>1</sup> H NMR for 3-(Phenylsulfonyl)-1,8-naphthyridin-2(1 <i>H</i> )-one ( <b>31</b> ) .....            | 20 |
| <sup>13</sup> C NMR for 3-(Phenylsulfonyl)-1,8-naphthyridin-2(1 <i>H</i> )-one ( <b>31</b> ) .....           | 20 |

<sup>1</sup>H NMR for 2-(2-Fluorophenyl)acetamide (14)

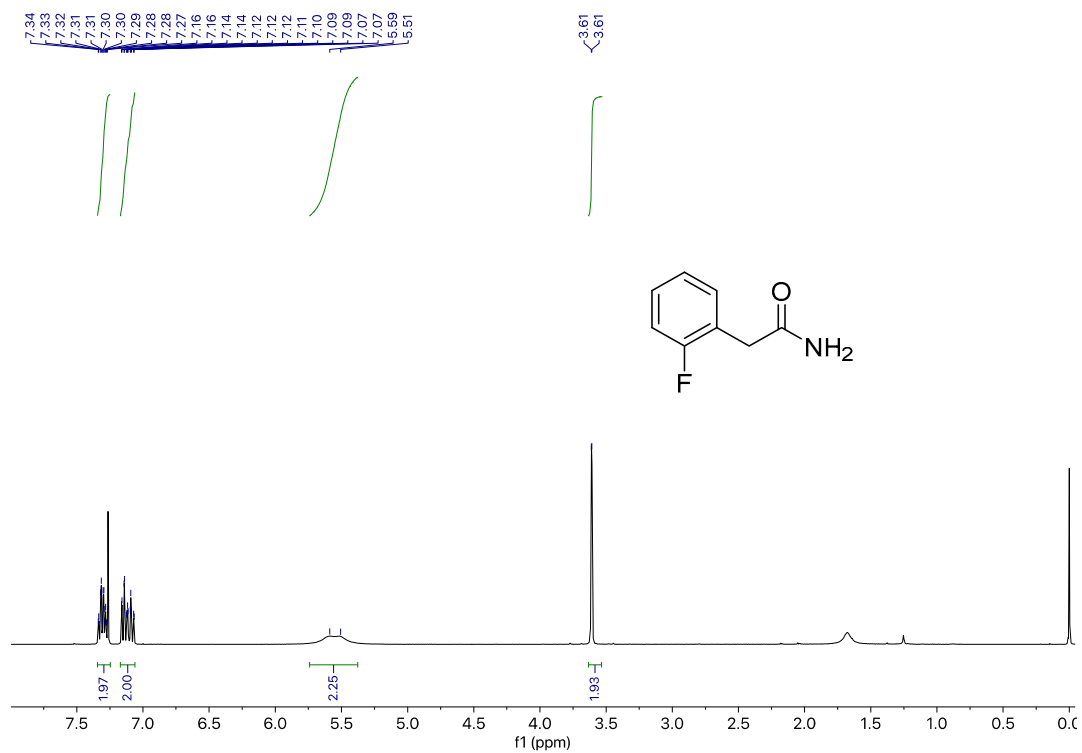

<sup>13</sup>C NMR for 2-(2-Fluorophenyl)acetamide (14)

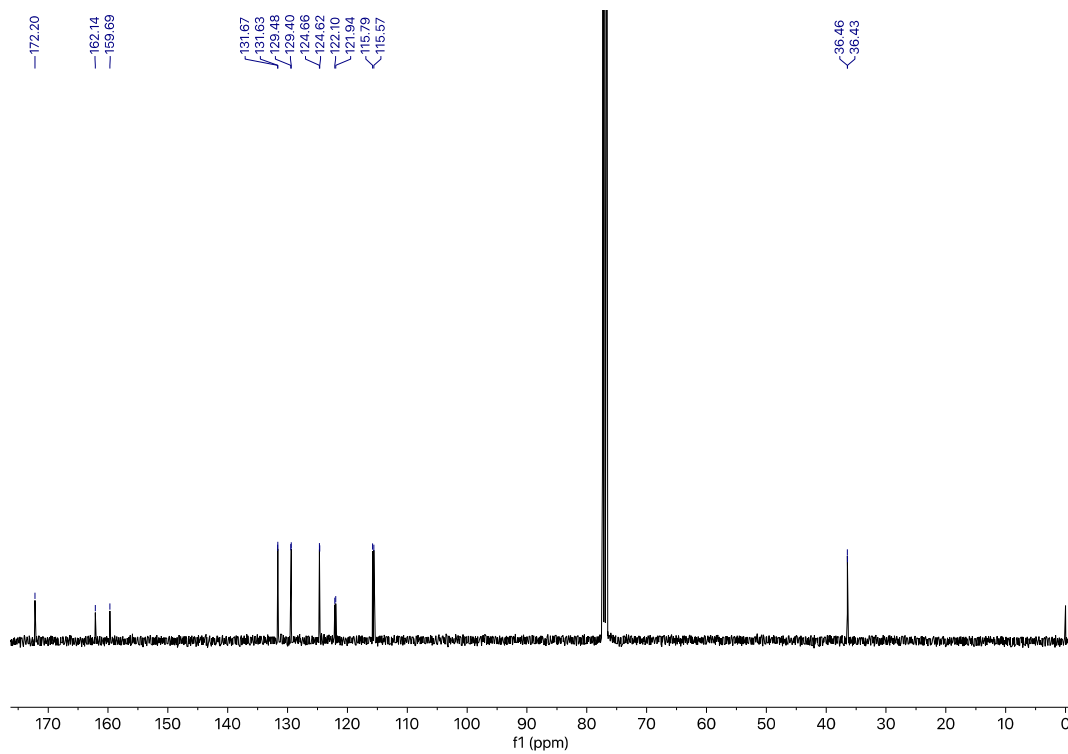

**<sup>1</sup>H NMR for 2-(4-Chlorophenyl)acetamide (15)**

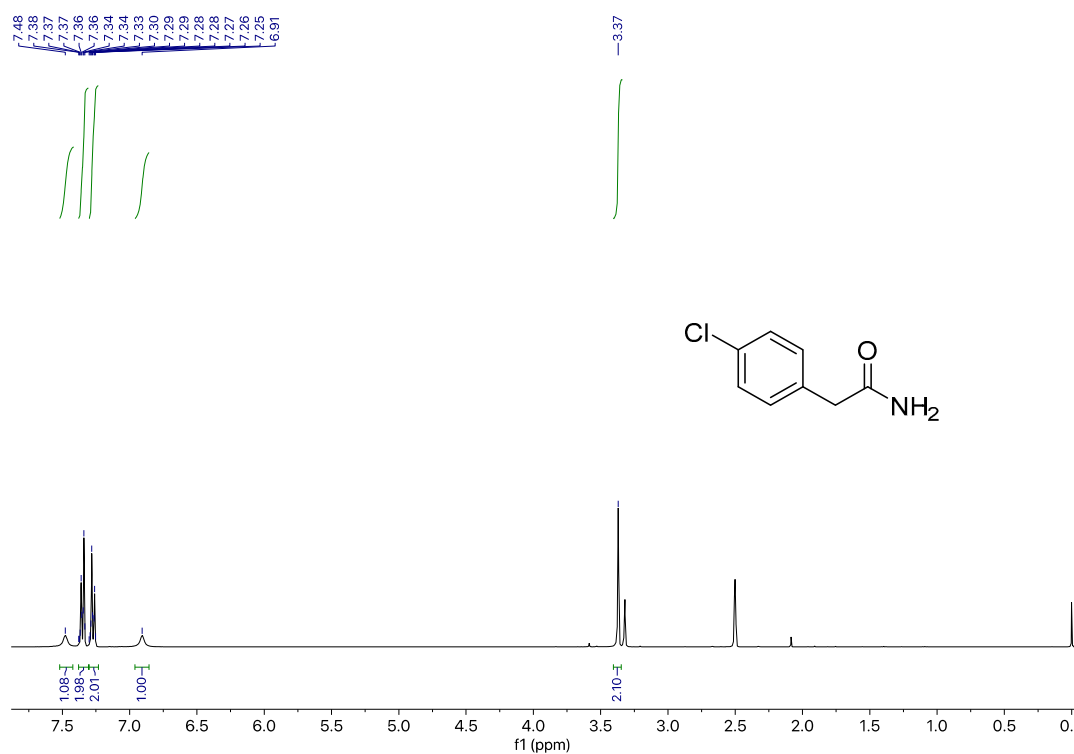

**<sup>13</sup>C NMR for 2-(4-Chlorophenyl)acetamide (15)**

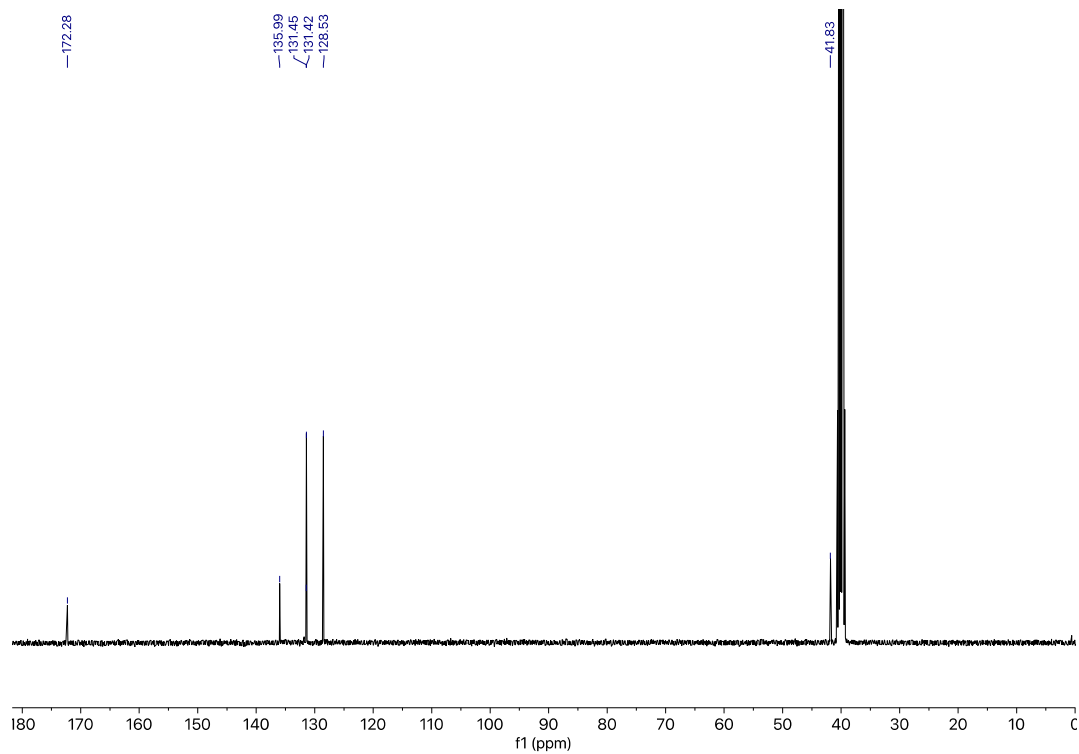

**<sup>1</sup>H NMR for 2-(2,5-Dimethylphenyl)acetamide (16)**

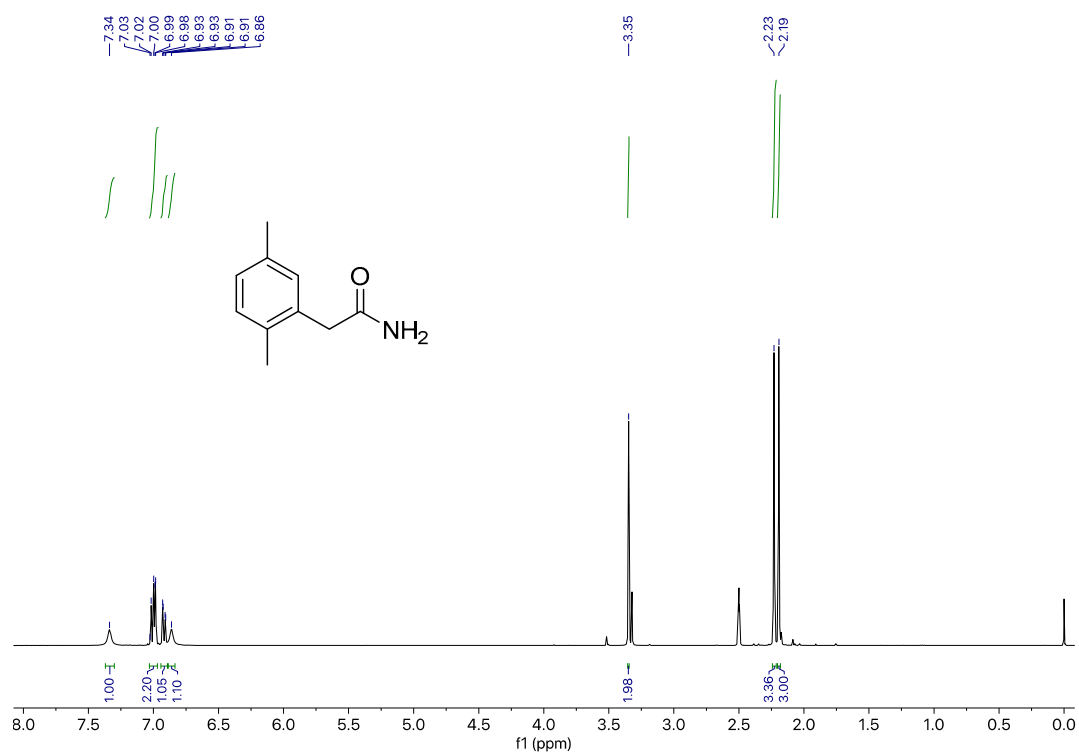

**<sup>13</sup>C NMR for 2-(2,5-Dimethylphenyl)acetamide (16)**

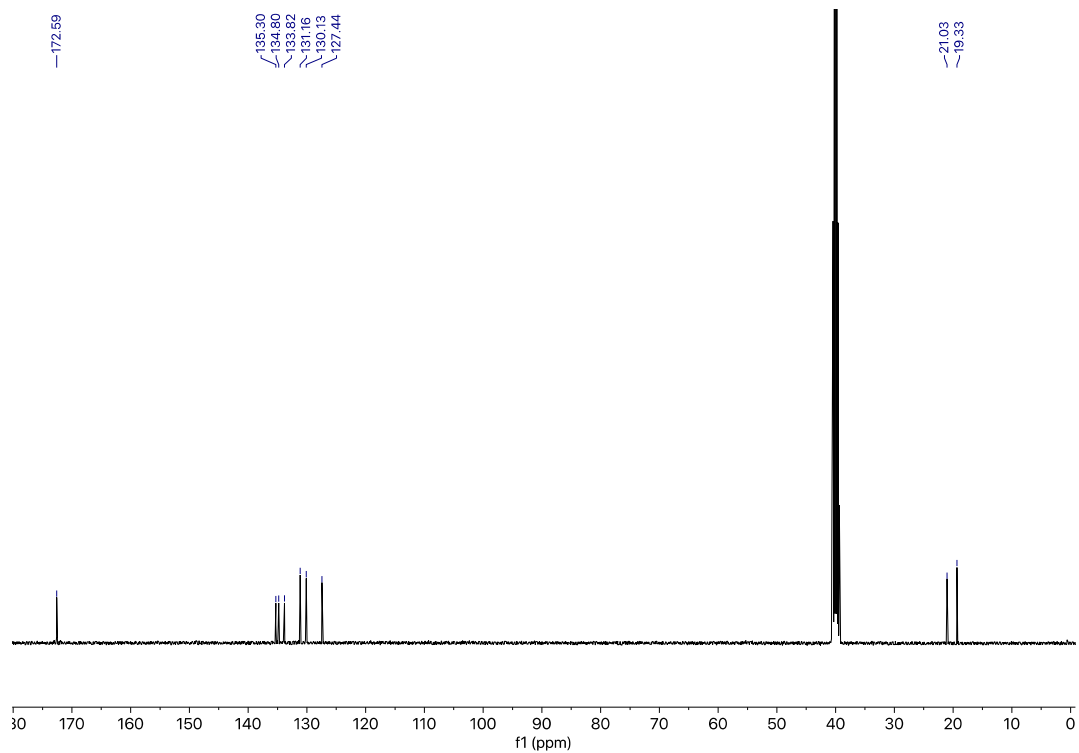

**<sup>1</sup>H NMR for 6-Nitro-3-phenylquinolin-2(1H)-one (17)**

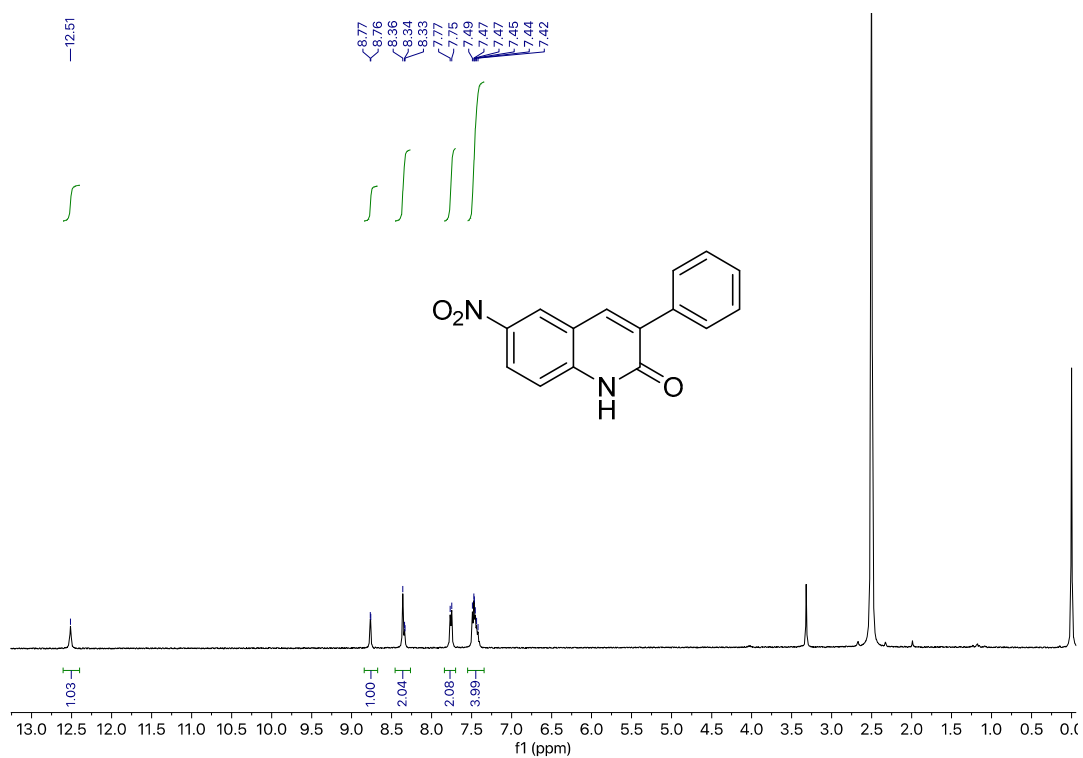

**<sup>13</sup>C NMR for 6-Nitro-3-phenylquinolin-2(1H)-one (17)**

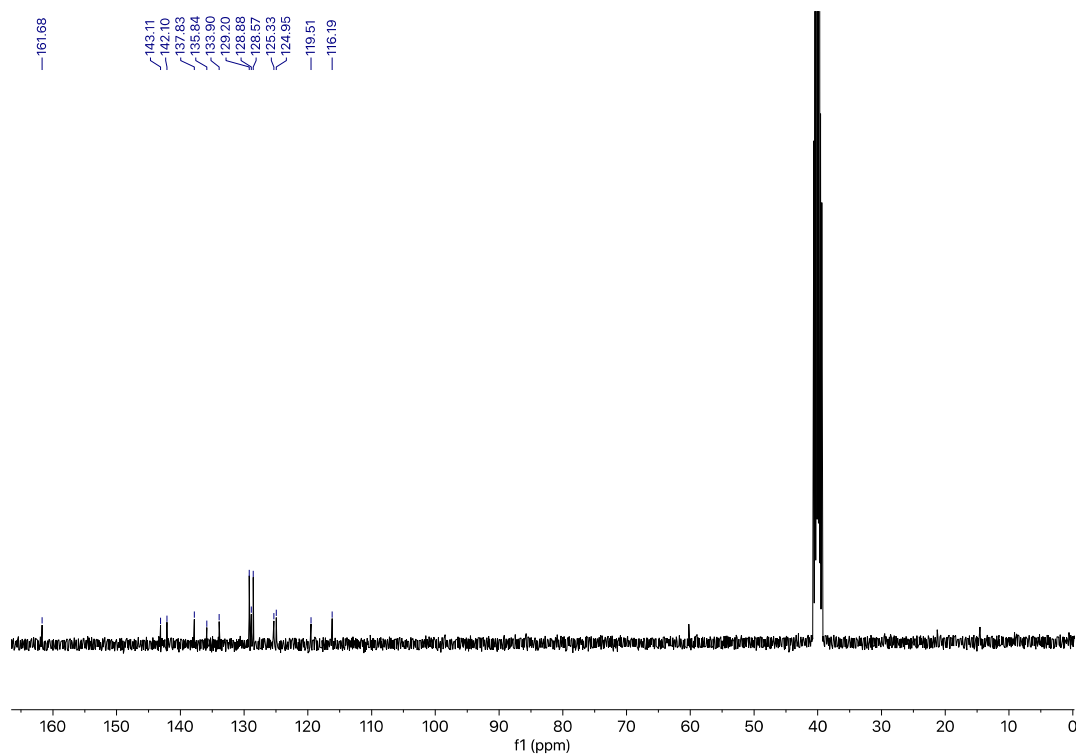

**<sup>1</sup>H NMR for 6-Nitro-3-(phenylsulfonyl)quinolin-2(1H)-one (18)**

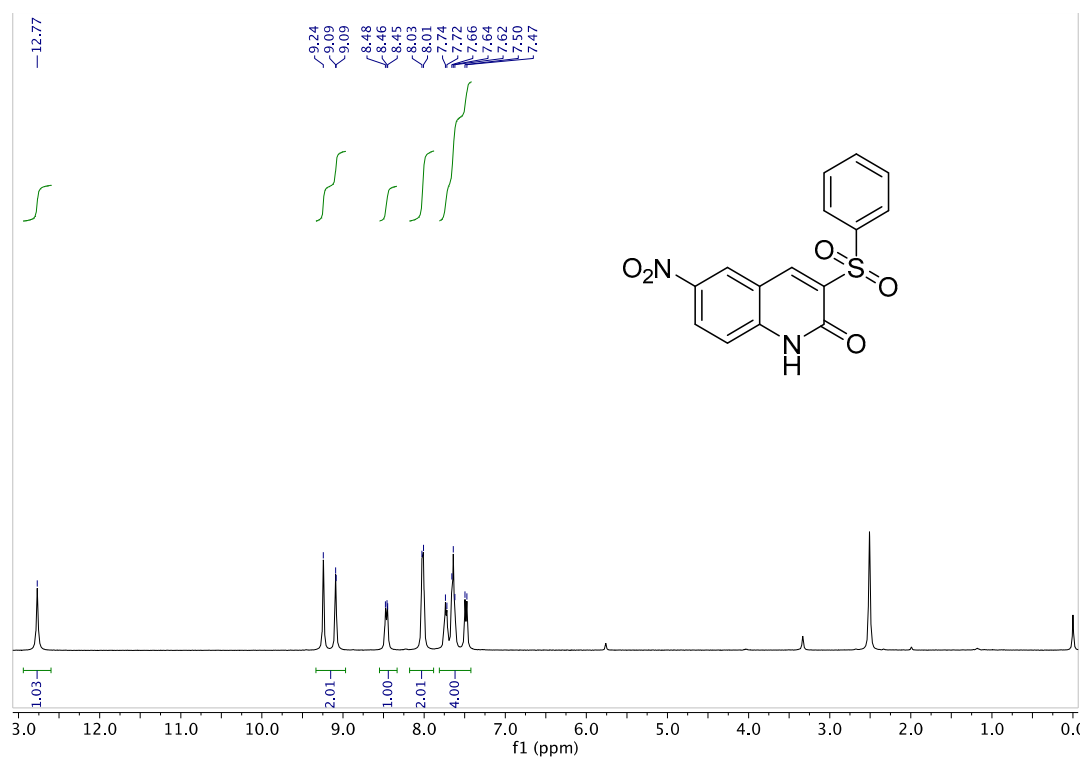

**<sup>13</sup>C NMR for 6-Nitro-3-(phenylsulfonyl)quinolin-2(1H)-one (18)**

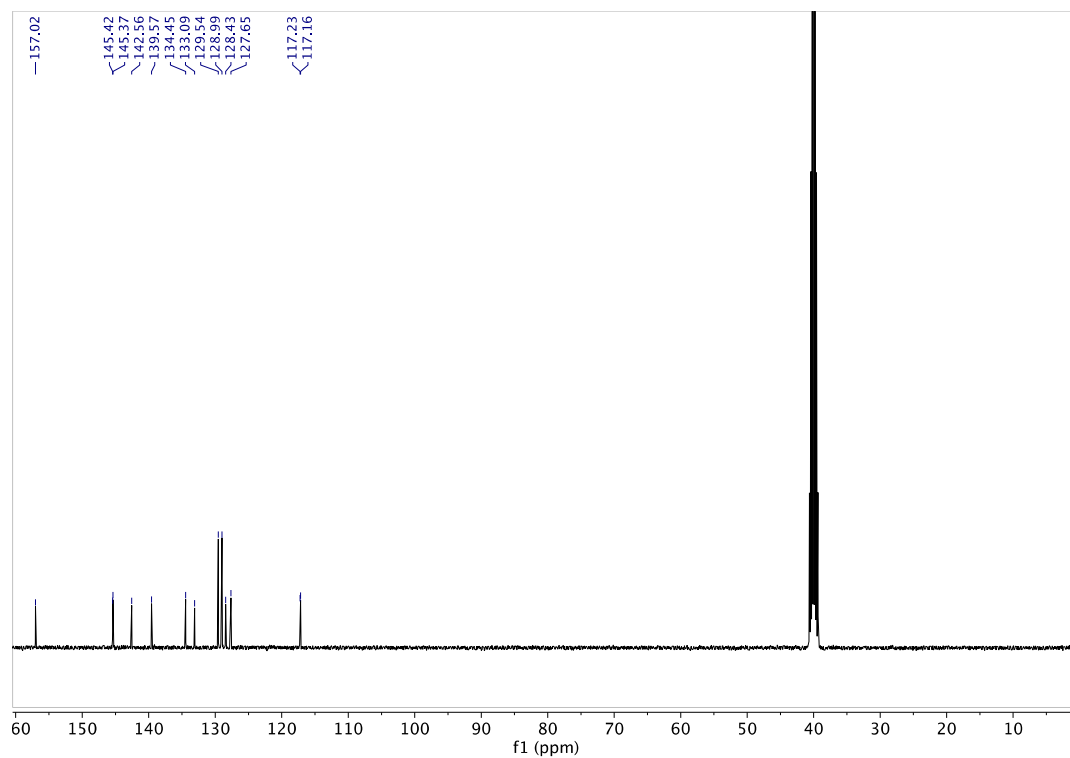

**<sup>1</sup>H NMR for 3-Carbethoxy-6-nitroquinolin-2(1H)-one (19)**

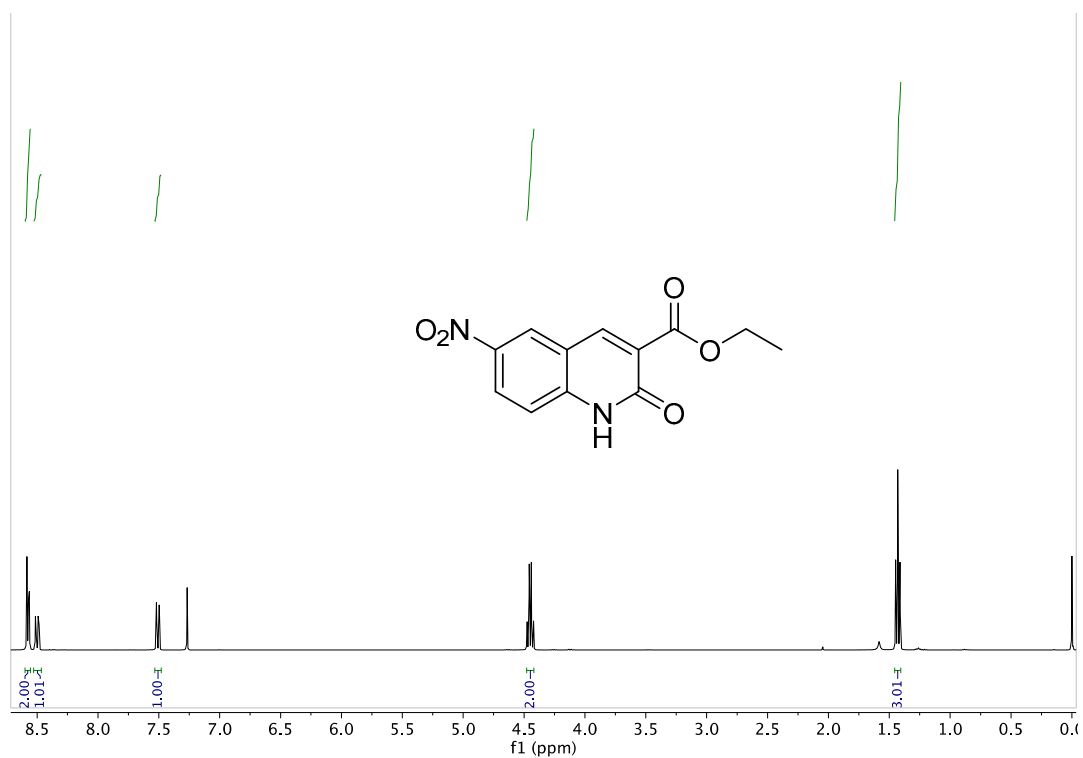

**<sup>13</sup>C NMR for 3-Carbethoxy-6-nitroquinolin-2(1H)-one (19)**

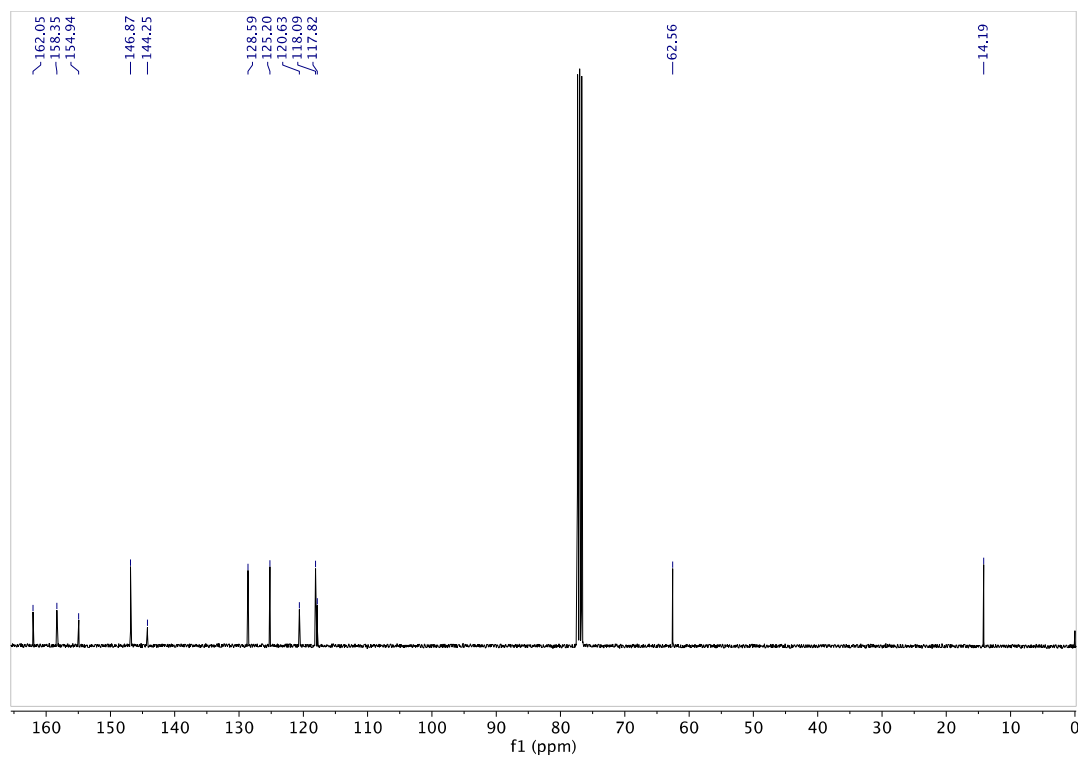



**<sup>1</sup>H NMR for 3-(4-Methoxyphenyl)-6-nitroquinolin-2(1H)-one (20)**

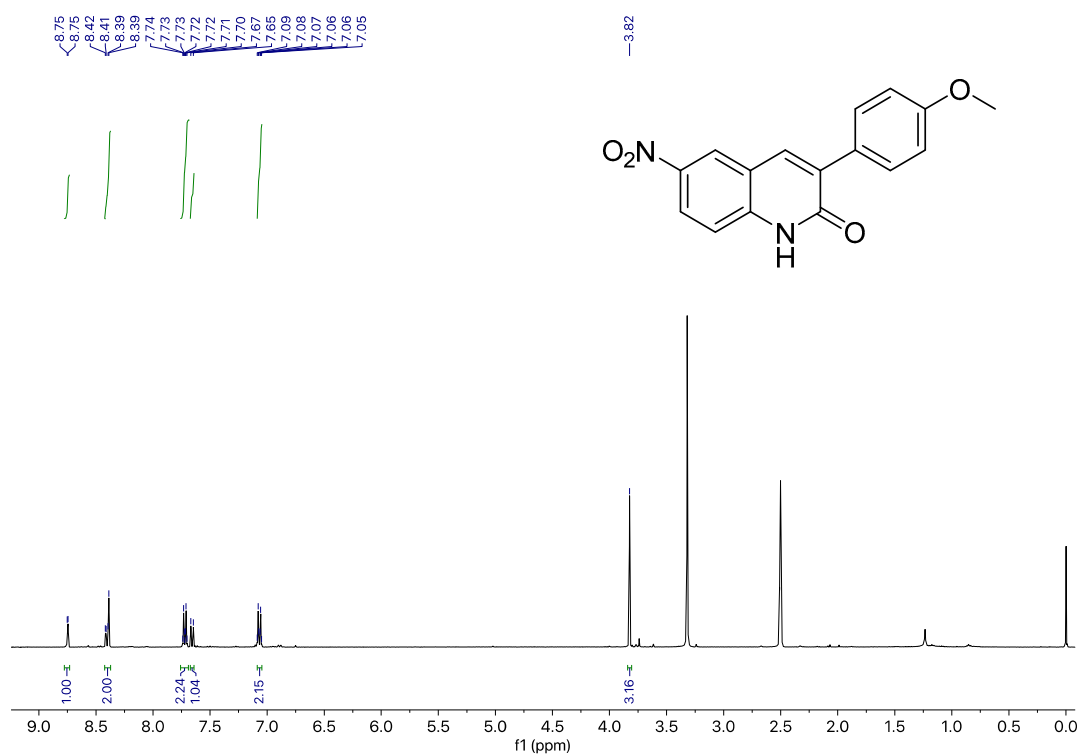

**<sup>13</sup>C NMR for 3-(4-Methoxyphenyl)-6-nitroquinolin-2(1H)-one (20)**

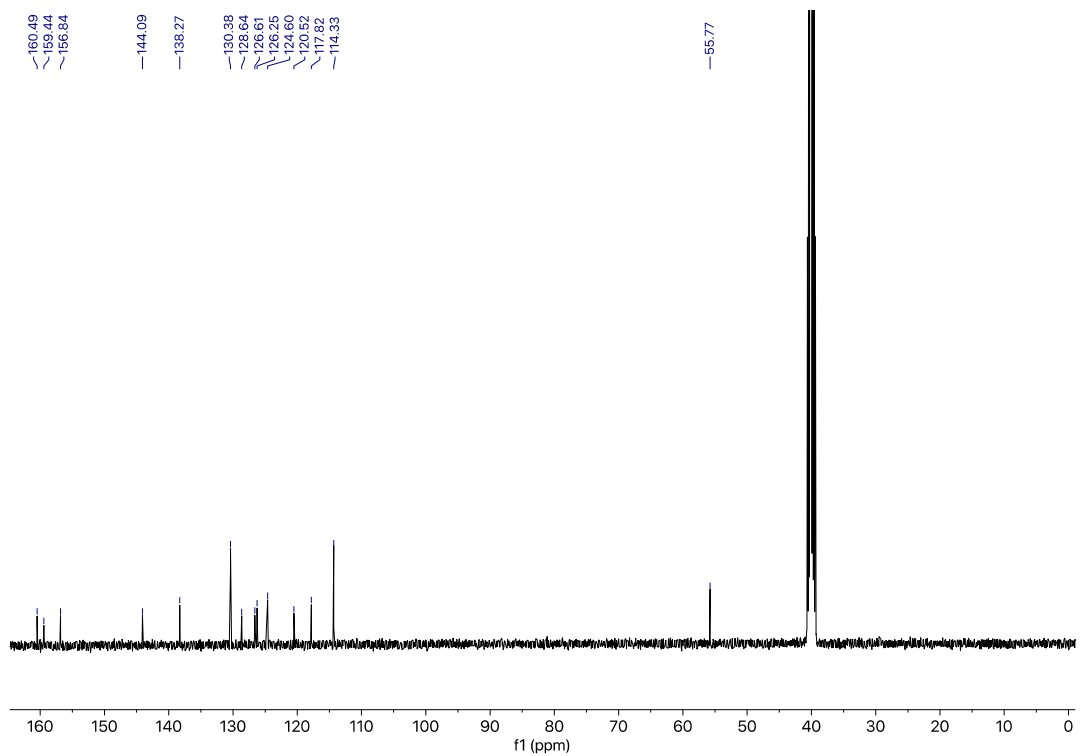

**<sup>1</sup>H NMR for 3-(2-Fluorophenyl)-6-nitroquinolin-2(1H)-one (21)**

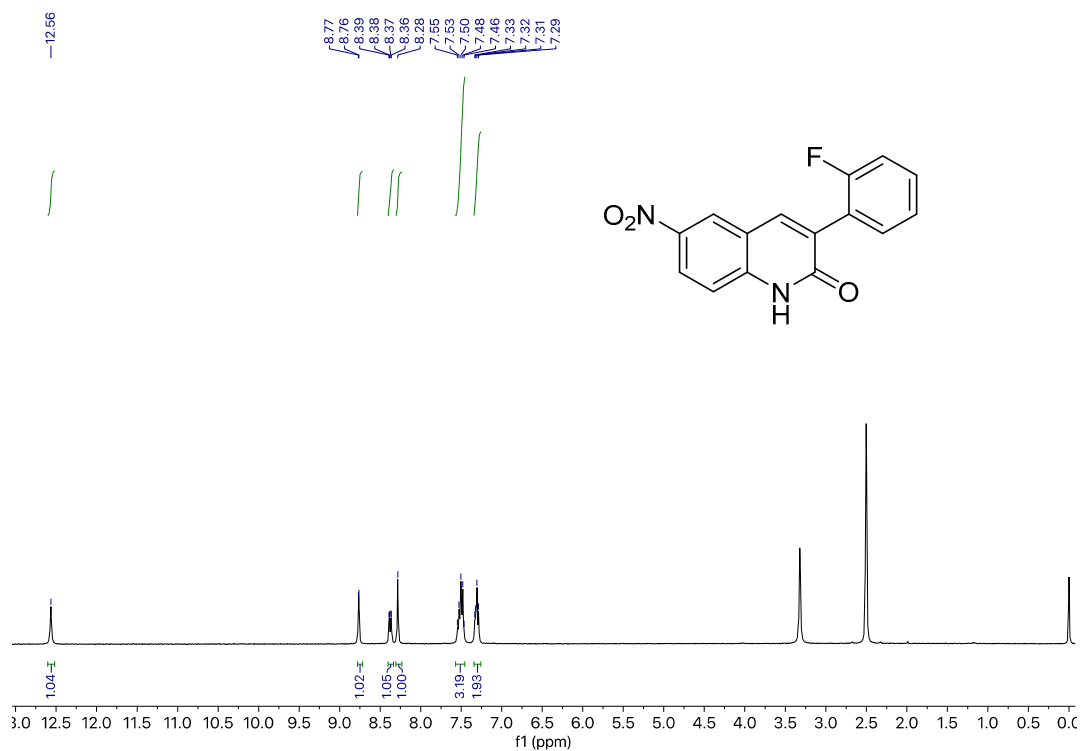

**<sup>13</sup>C NMR for 3-(2-Fluorophenyl)-6-nitroquinolin-2(1H)-one (21)**

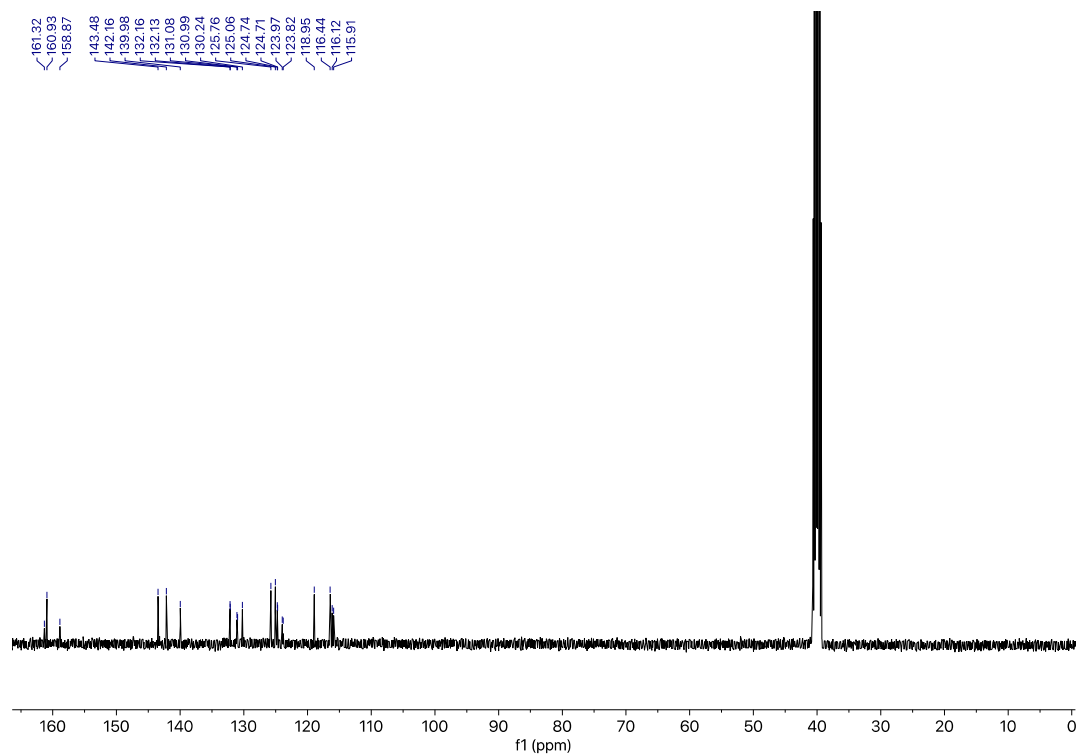

**<sup>1</sup>H NMR for 3-(4-Chlorophenyl)-6-nitroquinolin-2(1H)-one (22)**

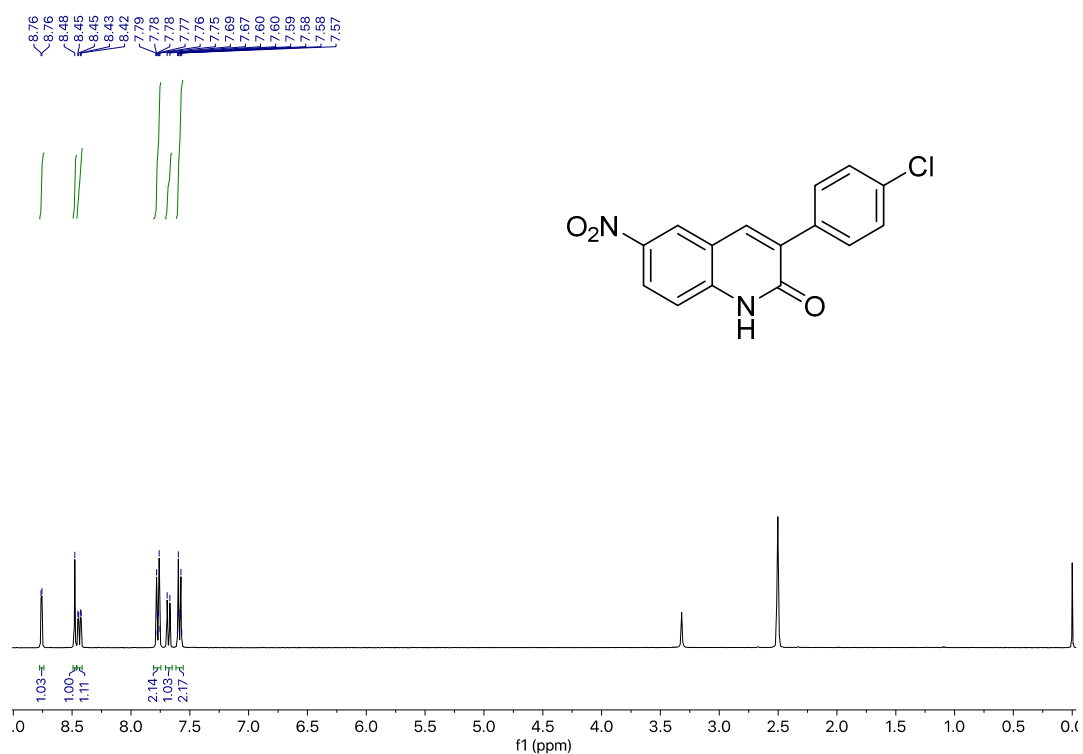

**<sup>13</sup>C NMR for 3-(4-Chlorophenyl)-6-nitroquinolin-2(1H)-one (22)**

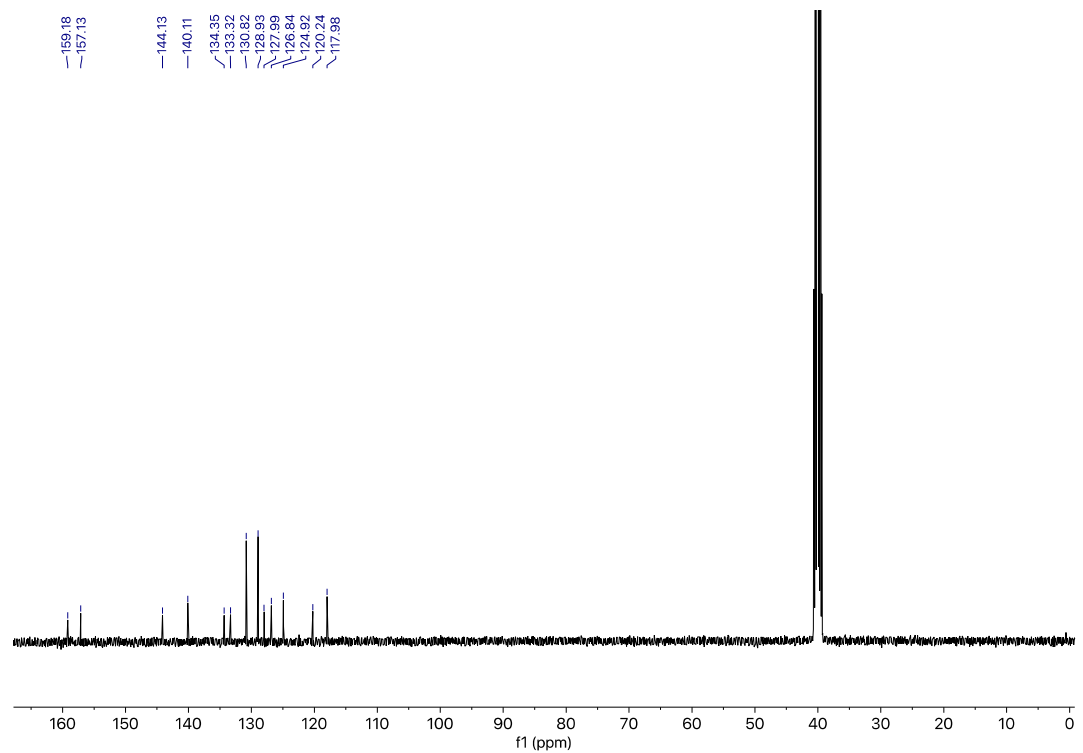

**<sup>1</sup>H NMR for 3-(2,5-Dimethylphenyl)-6-nitroquinolin-2(1H)-one (23)**

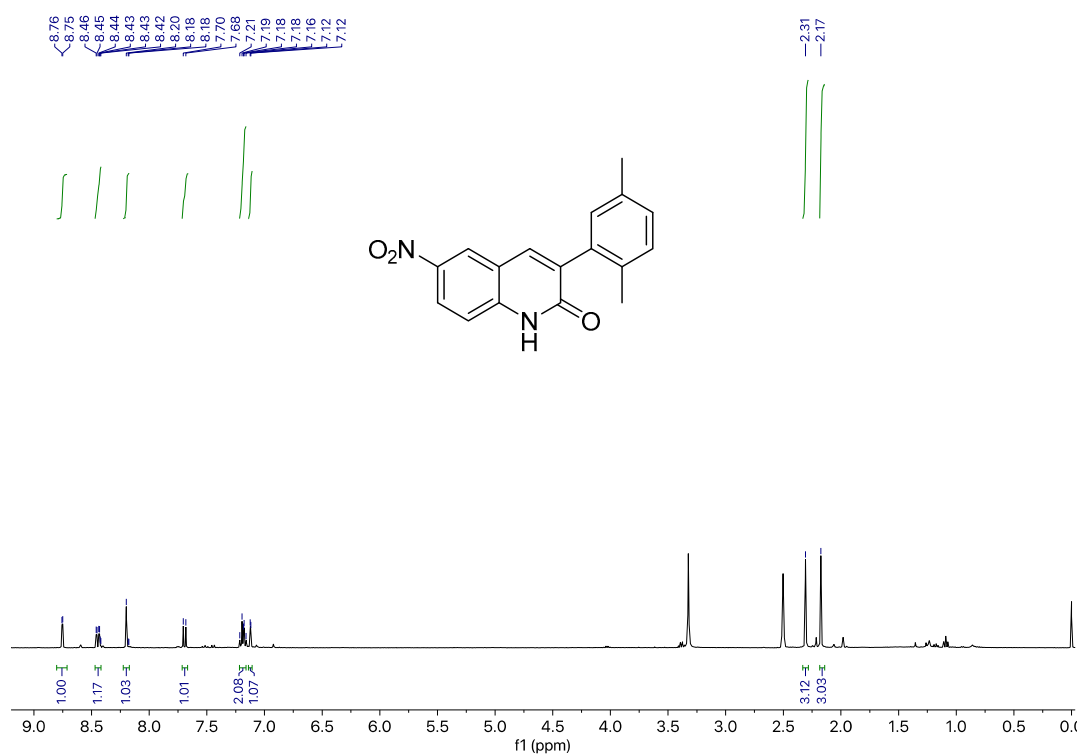

**<sup>13</sup>C NMR for 3-(2,5-Dimethylphenyl)-6-nitroquinolin-2(1H)-one (23)**

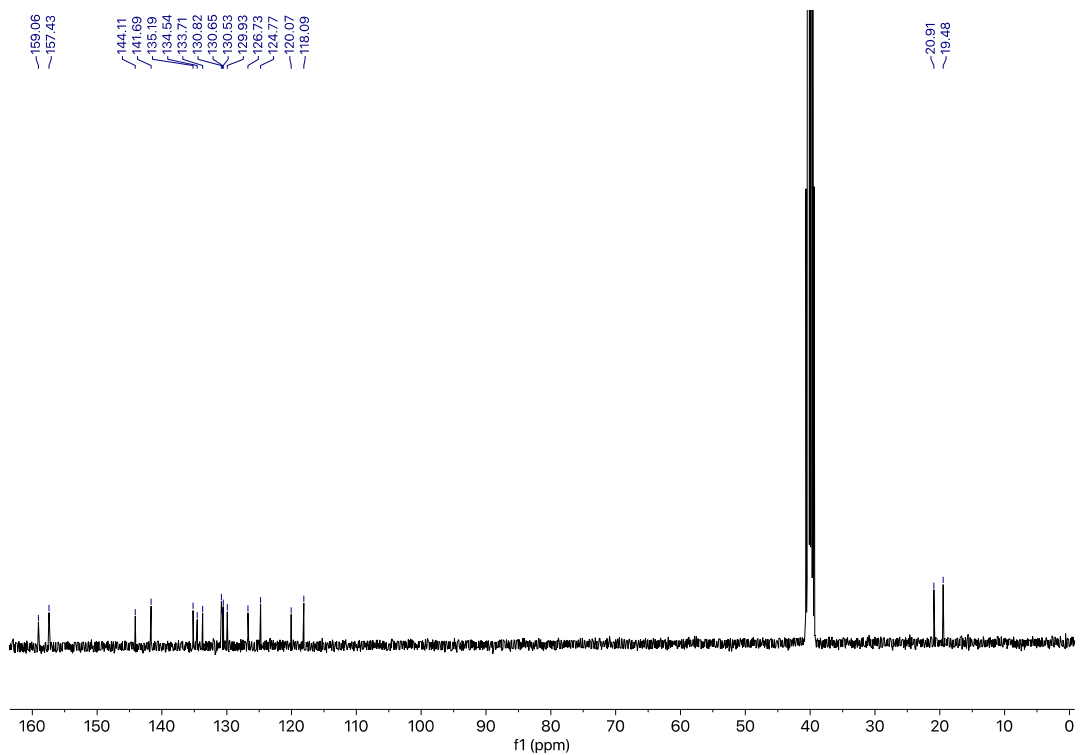

**<sup>1</sup>H NMR for 2-6-Cyano-3-phenylquinolin-2(1H)-one (24)**

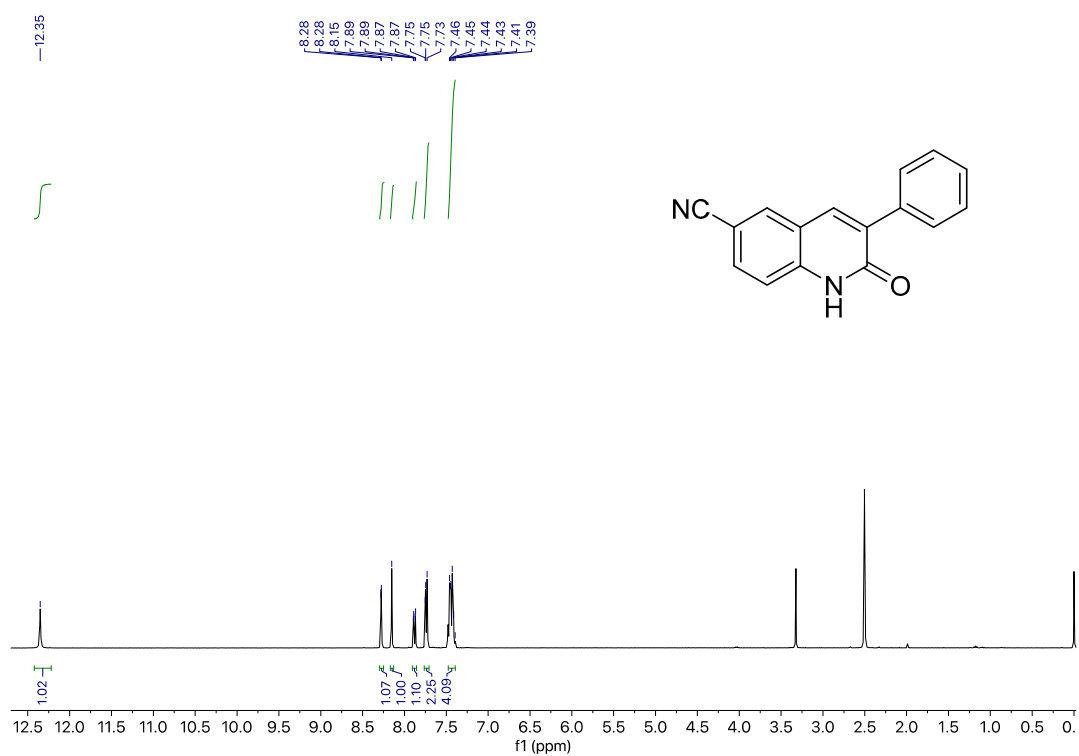

**<sup>13</sup>C NMR for 6-Cyano-3-phenylquinolin-2(1H)-one (24)**

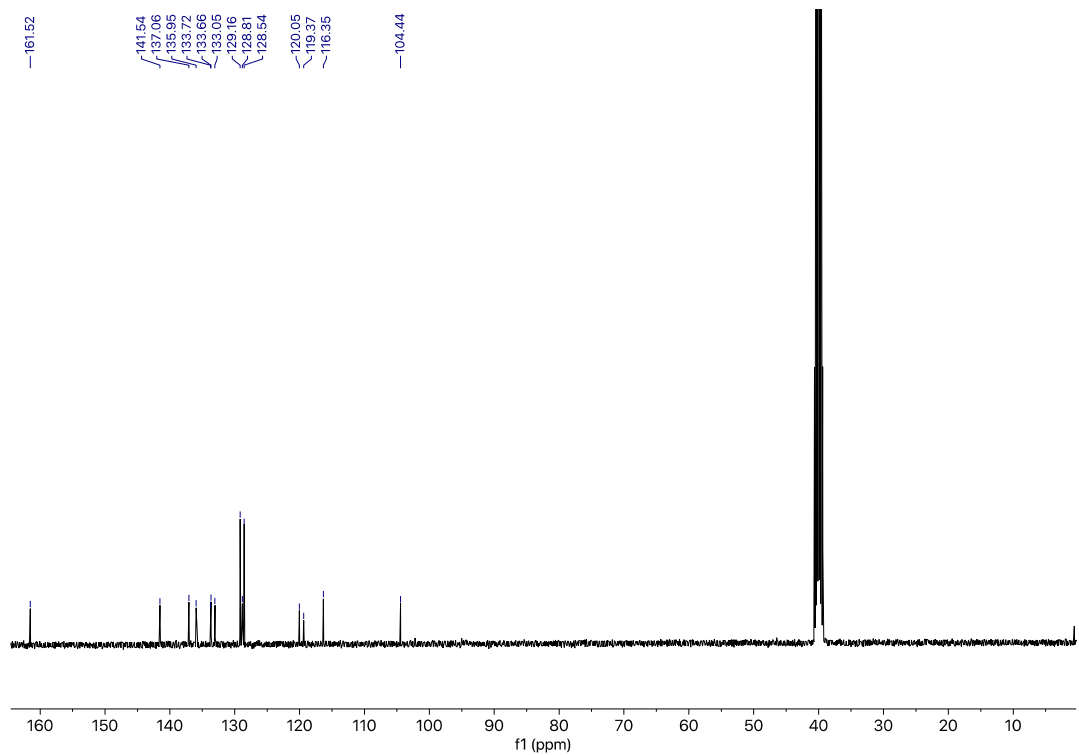

<sup>1</sup>H NMR for 6-Cyano-3-(phenylsulfonyl)quinolin-2(1H)-one (25)

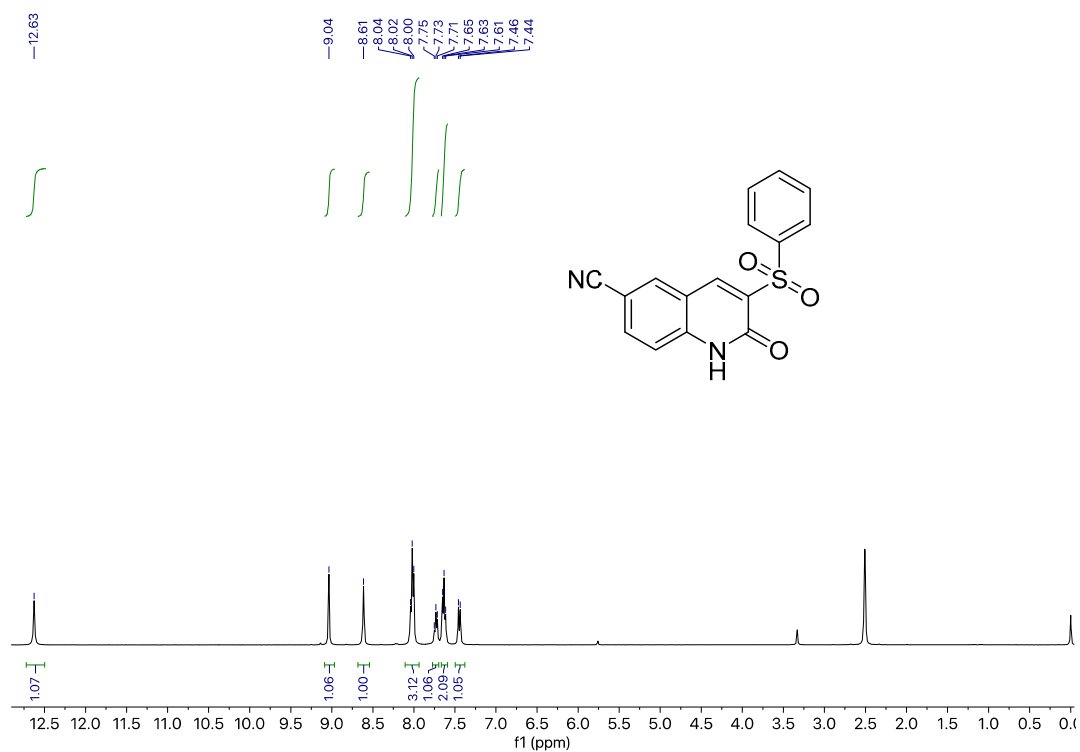

<sup>13</sup>C NMR for 6-Cyano-3-(phenylsulfonyl)quinolin-2(1H)-one (25)

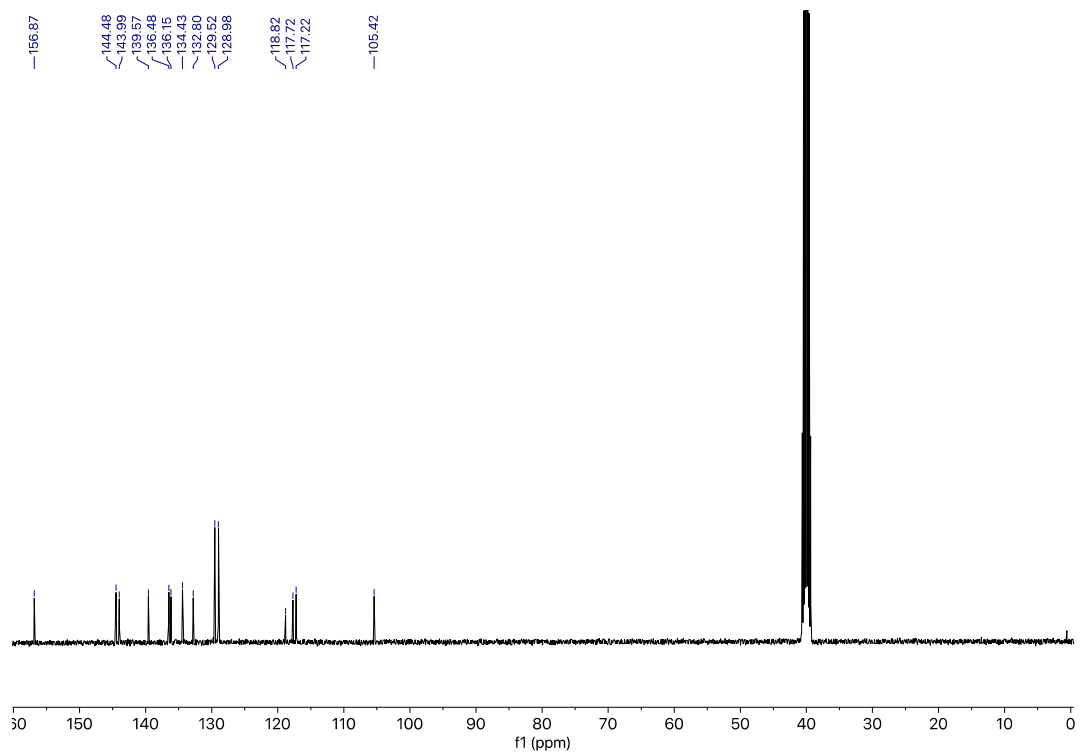

**<sup>1</sup>H NMR for 6-Carbomethoxy-3-phenylquinolin-2(1H)-one (26)**

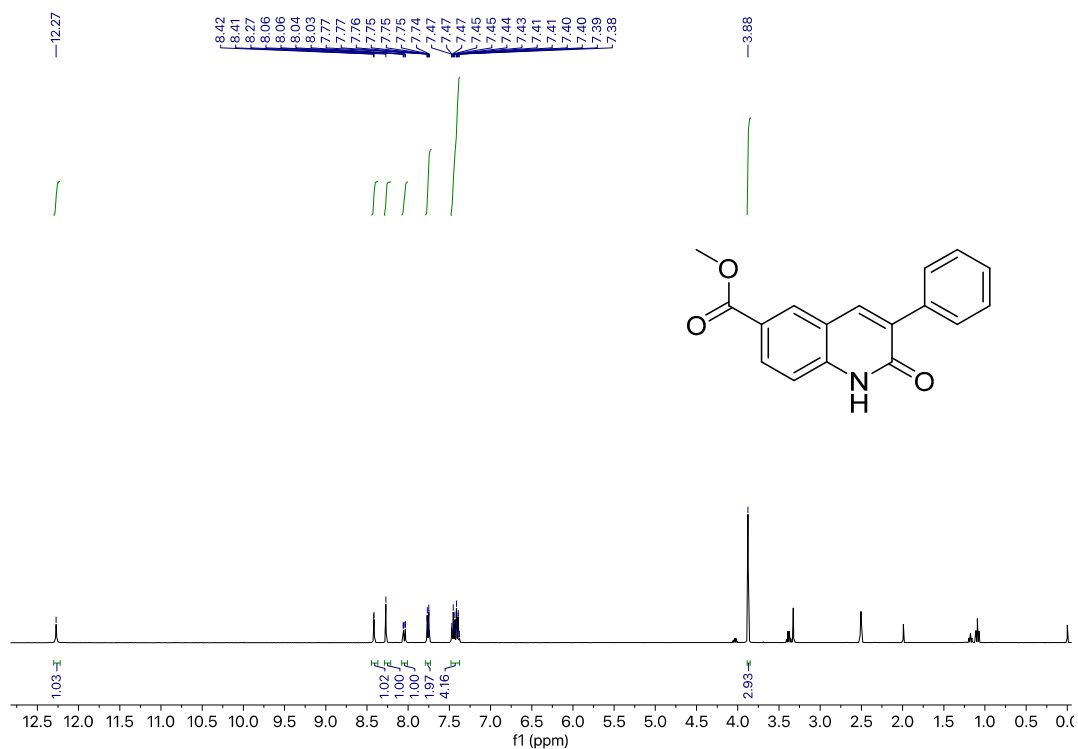

**<sup>13</sup>C NMR for 6-Carbomethoxy-3-phenylquinolin-2(1H)-one (26)**

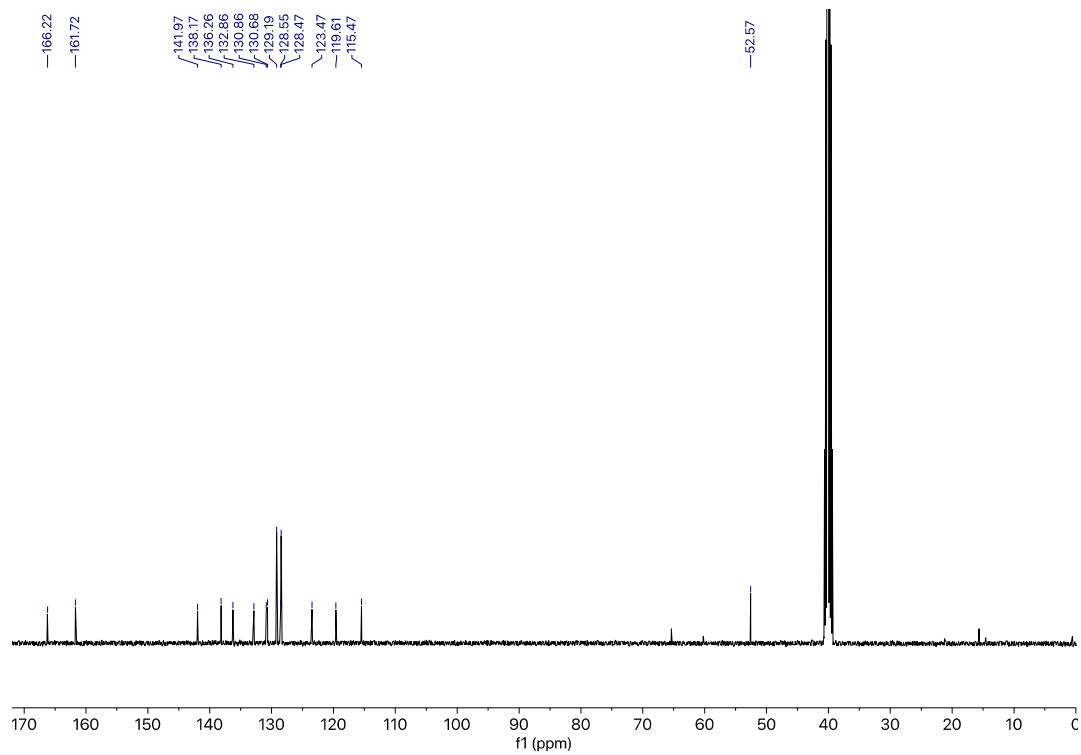

<sup>1</sup>H NMR for 6-Carbomethoxy-3-(phenylsulfonyl)quinolin-2(1H)-one (27)

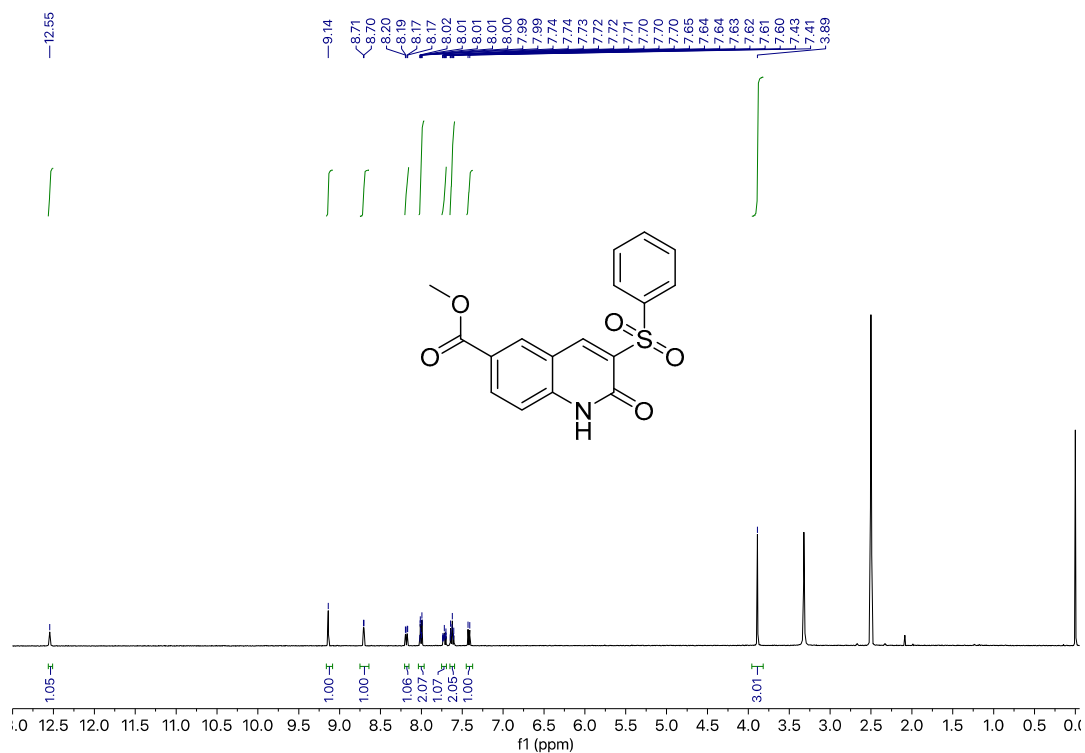

<sup>13</sup>C NMR for 6-Carbomethoxy-3-(phenylsulfonyl)quinolin-2(1H)-one (27)

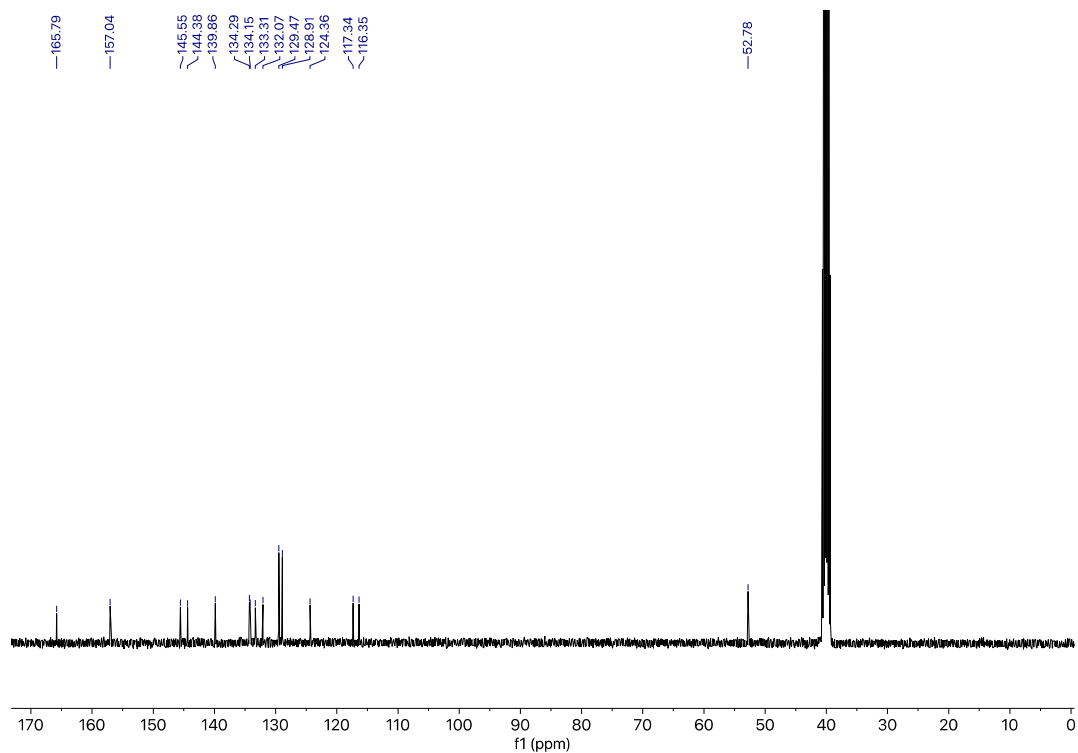



**<sup>1</sup>H NMR for 3-Phenyl-6-(trifluoromethyl)quinolin-2(1H)-one (28)**

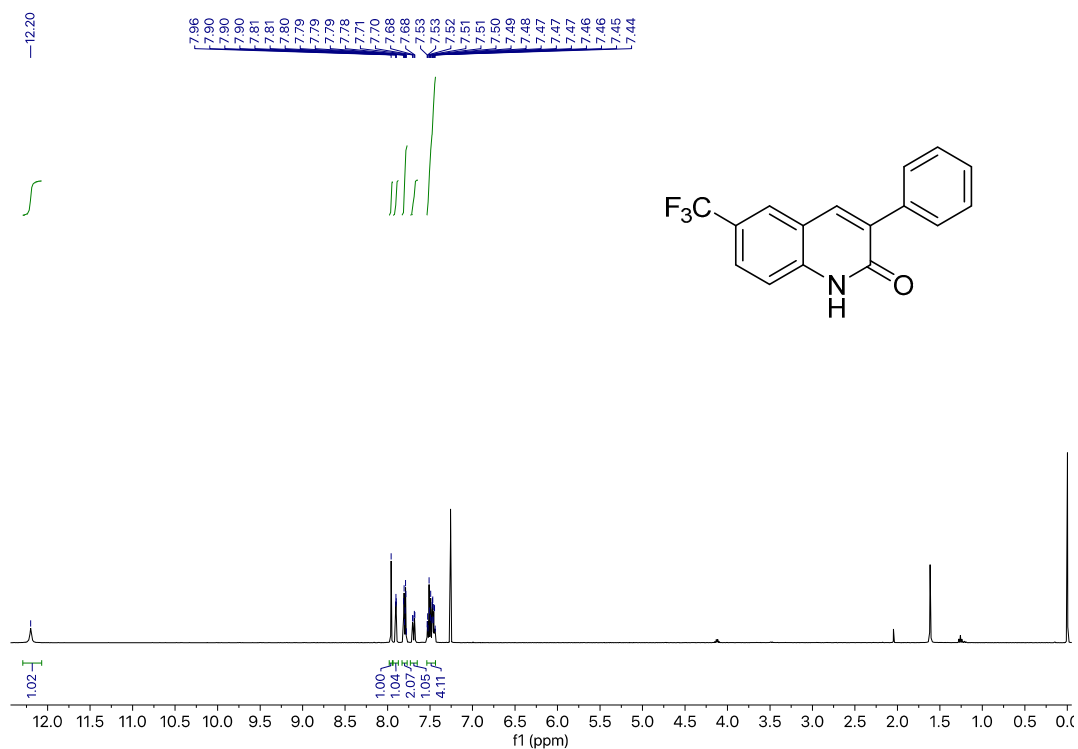

**<sup>13</sup>C NMR for 3-Phenyl-6-(trifluoromethyl)quinolin-2(1H)-one (28)**

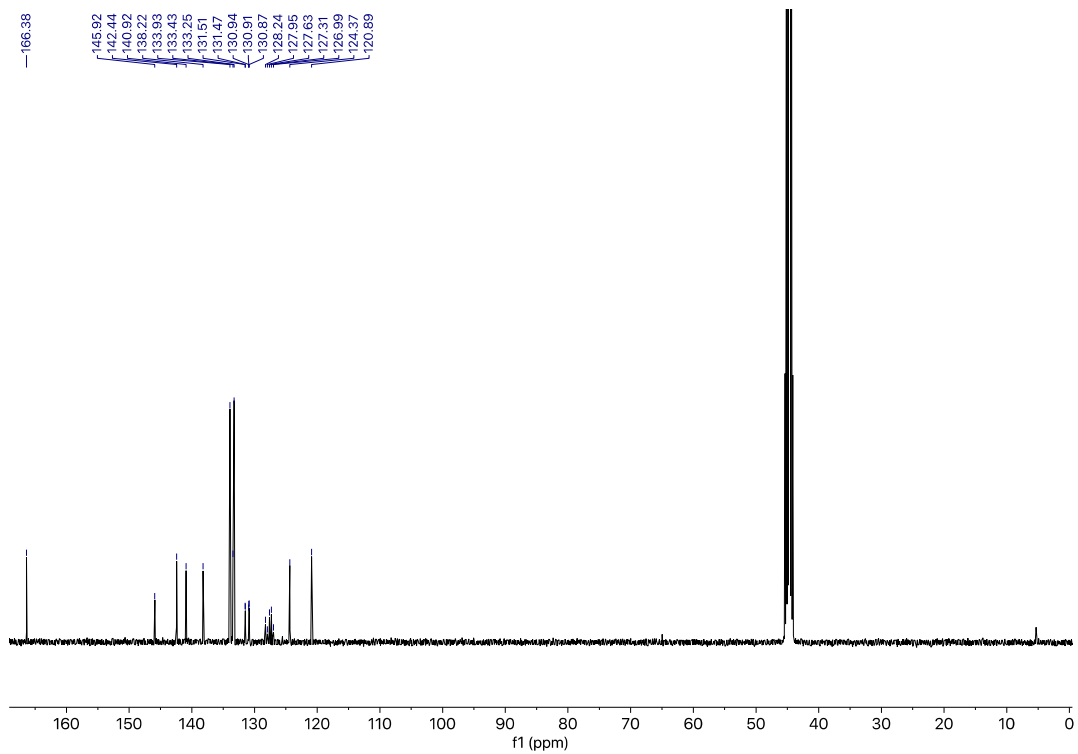

**<sup>1</sup>H NMR for 3-(Phenylsulfonyl)-6-(trifluoromethyl)quinolin-2(1H)-one (29)**

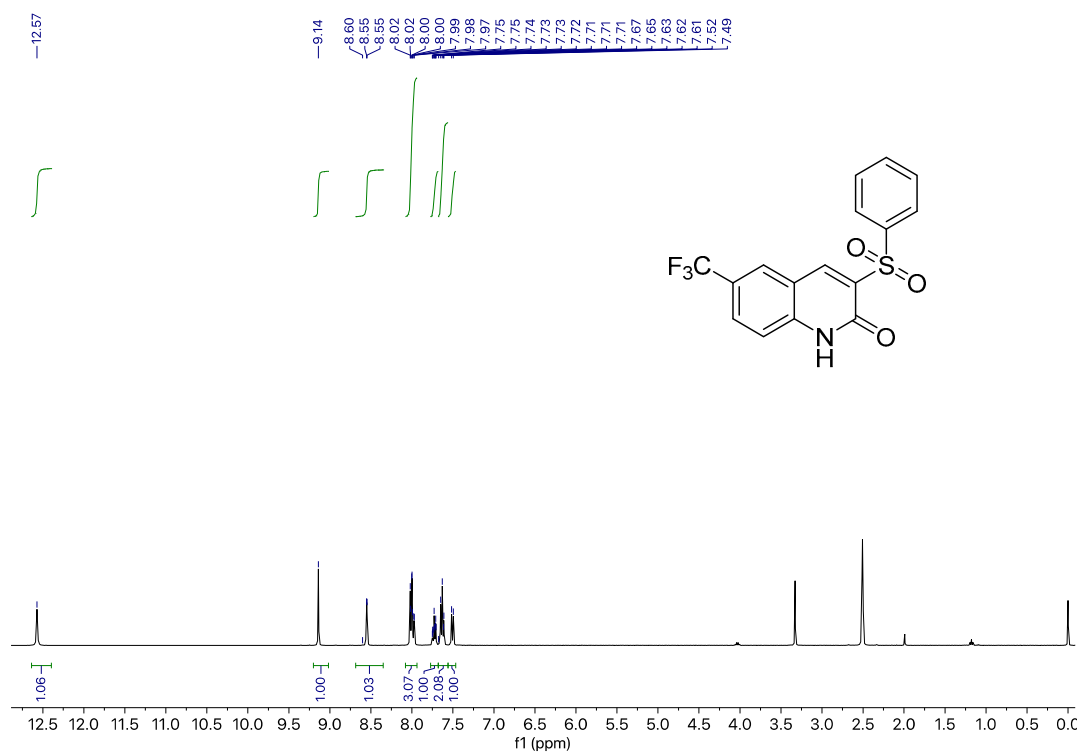

**<sup>13</sup>C NMR for 3-(Phenylsulfonyl)-6-(trifluoromethyl)quinolin-2(1H)-one (29)**

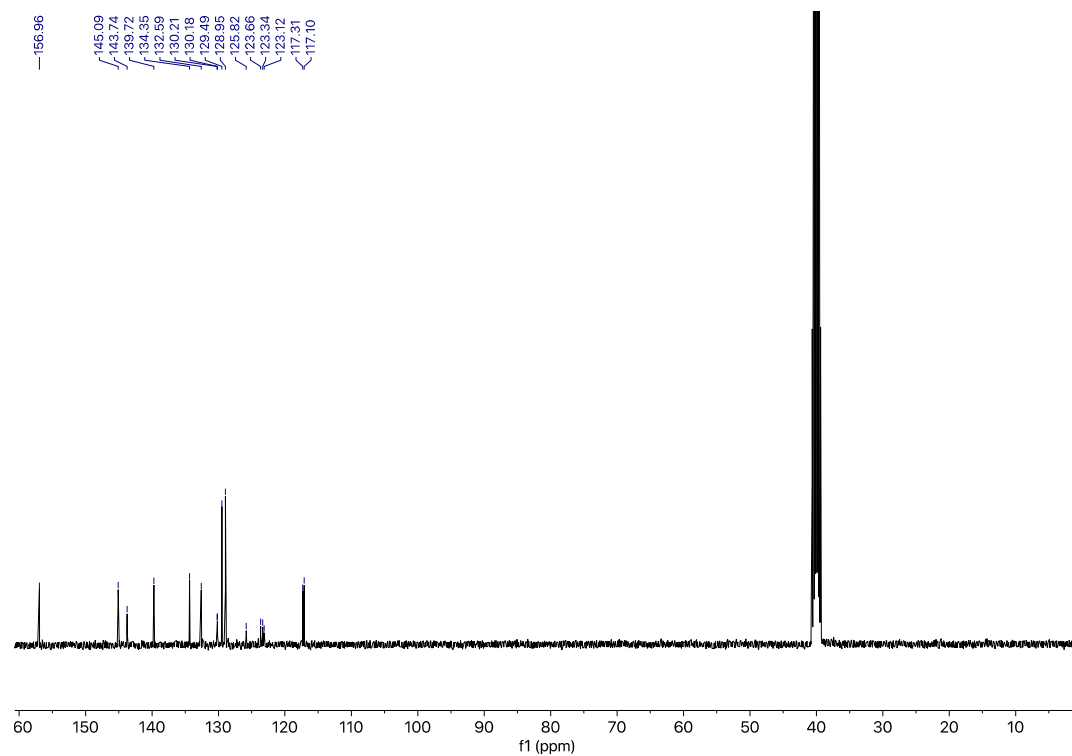

**<sup>1</sup>H NMR for 3-Phenyl-1,8-naphthyridin-2(1H)-one (30)**

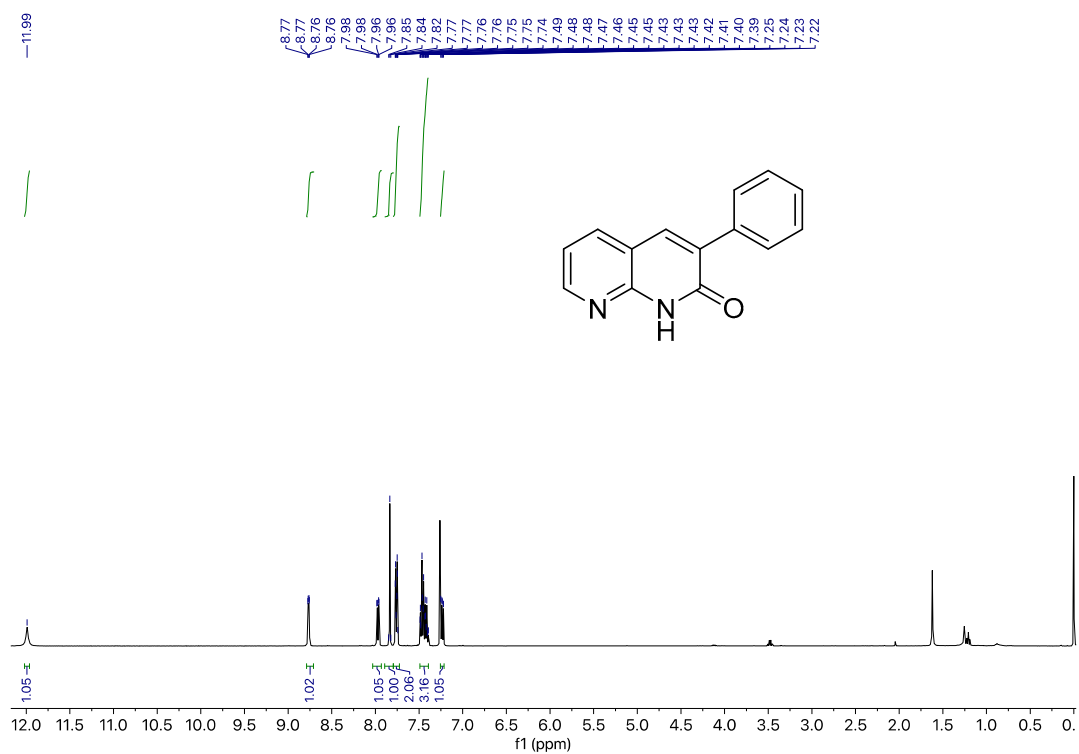

**<sup>13</sup>C NMR for 3-Phenyl-1,8-naphthyridin-2(1H)-one (30)**

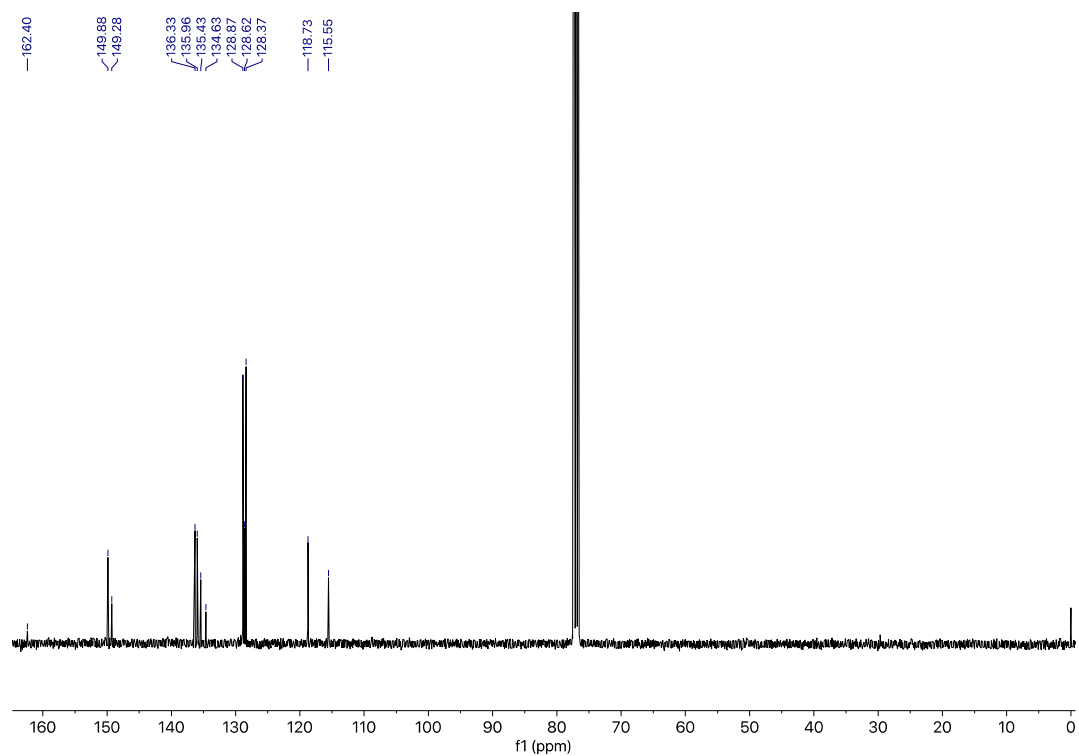

**<sup>1</sup>H NMR for 3-(Phenylsulfonyl)-1,8-naphthyridin-2(1H)-one (31)**

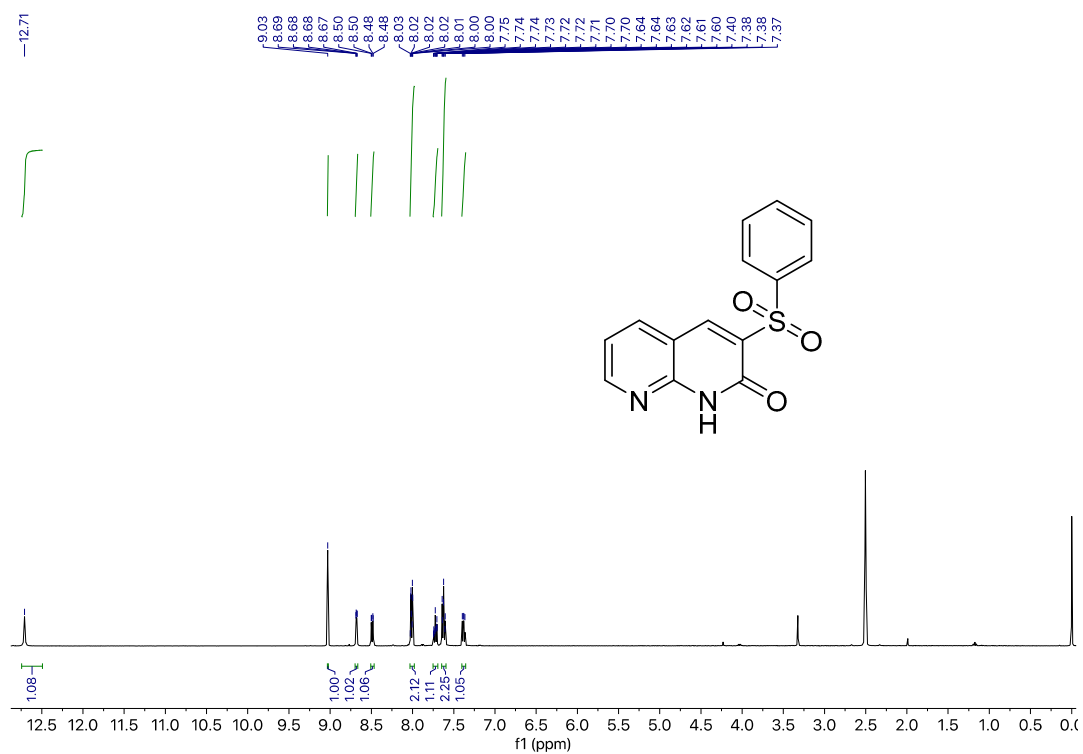

**<sup>13</sup>C NMR for 3-(Phenylsulfonyl)-1,8-naphthyridin-2(1H)-one (31)**

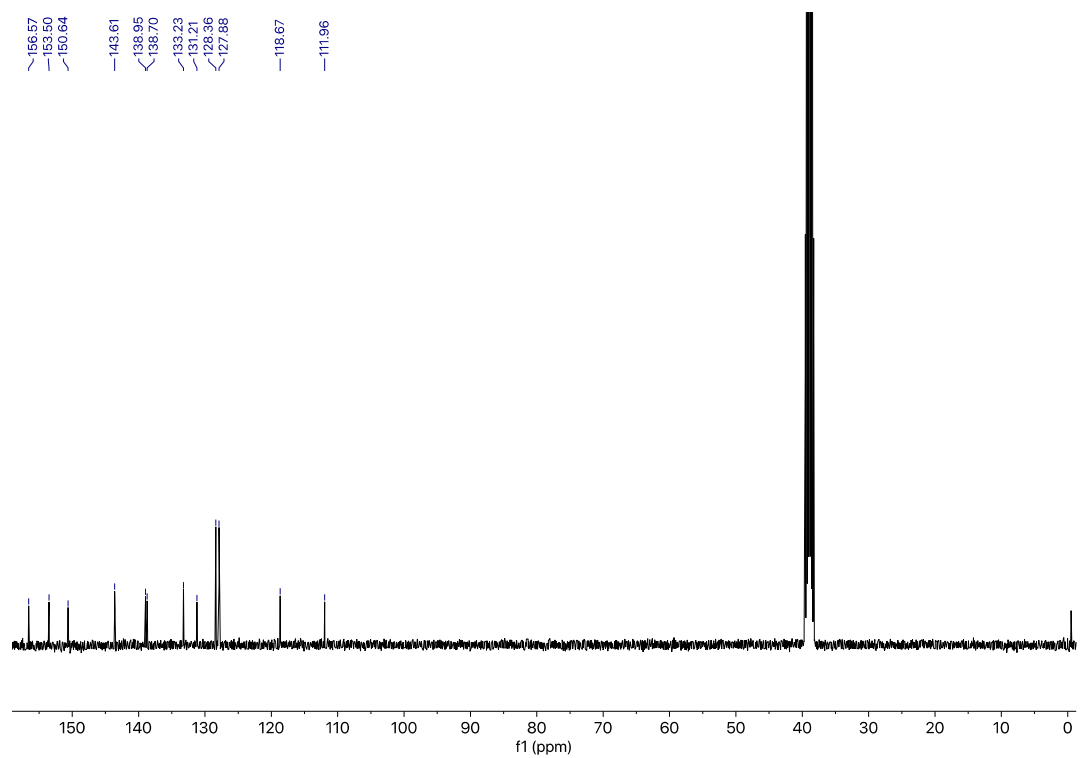

Supplement: s1 [file s1]
